# Supplementary material for: Detection of leukemia markers using long-range surface plasmon waveguides functionalized with Protein G
Source: Royal Society of Chemistry journal article supplement (doi:10.1039/c5lc00940e), 2015-01-01
Supplement: c5lc00940e1.pdf [file c5lc00940e1.pdf]

## Supplementary Material

### Detection of leukemia markers using long-range surface plasmon waveguides functionalized with Protein G

Oleksiy Krupin<sup>a</sup>, Chen Wang<sup>b</sup> and Pierre Berini<sup>c,d,e</sup>

<sup>a</sup>Department of Biological and Chemical Engineering, University of Ottawa, 161 Louis Pasteur, Ottawa, Ontario, K1N 6N5, Canada

<sup>b</sup>Department of Pathology and Laboratory Medicine, Mount Sinai Hospital, University of Toronto, 600 University Ave., Toronto, M5G1X5, Canada

<sup>c</sup>School of Electrical Engineering and Computer Science, University of Ottawa, 800 King Edward Ave., Ottawa, K1N6N5, Canada

<sup>d</sup>Department of Physics, University of Ottawa, 150 Louis Pasteur, Ottawa, K1N 6N5, Canada

<sup>e</sup>Centre for Research in Photonics, University of Ottawa, Ottawa, K1N 6N5, Canada

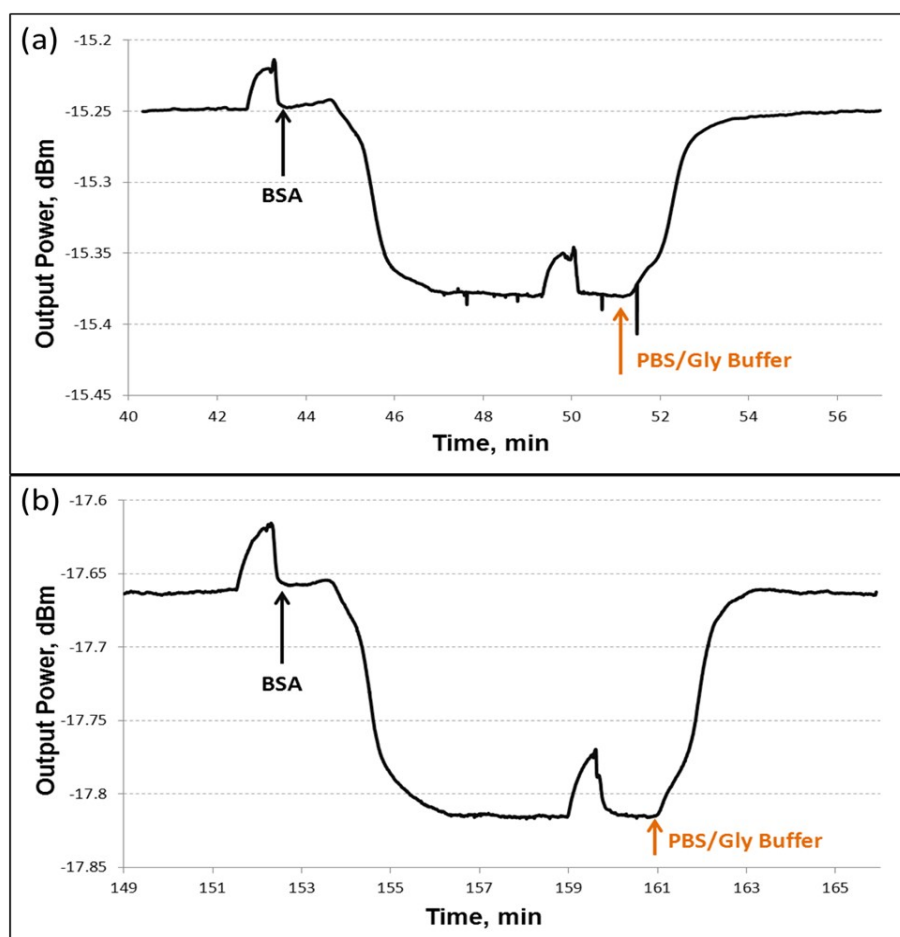

**Fig. S1** Blocking non-specific binding sites with bovine serum albumin (BSA, 1 mg/ml): (a) after Protein G functionalization step and (b) after first IgG functionalization step (no prior BSA blocking). Shown results are for validation experiments of human IgG $\kappa$ :AK using direct approach. Decreased output power after BSA injection is due to the RI bulk effect.

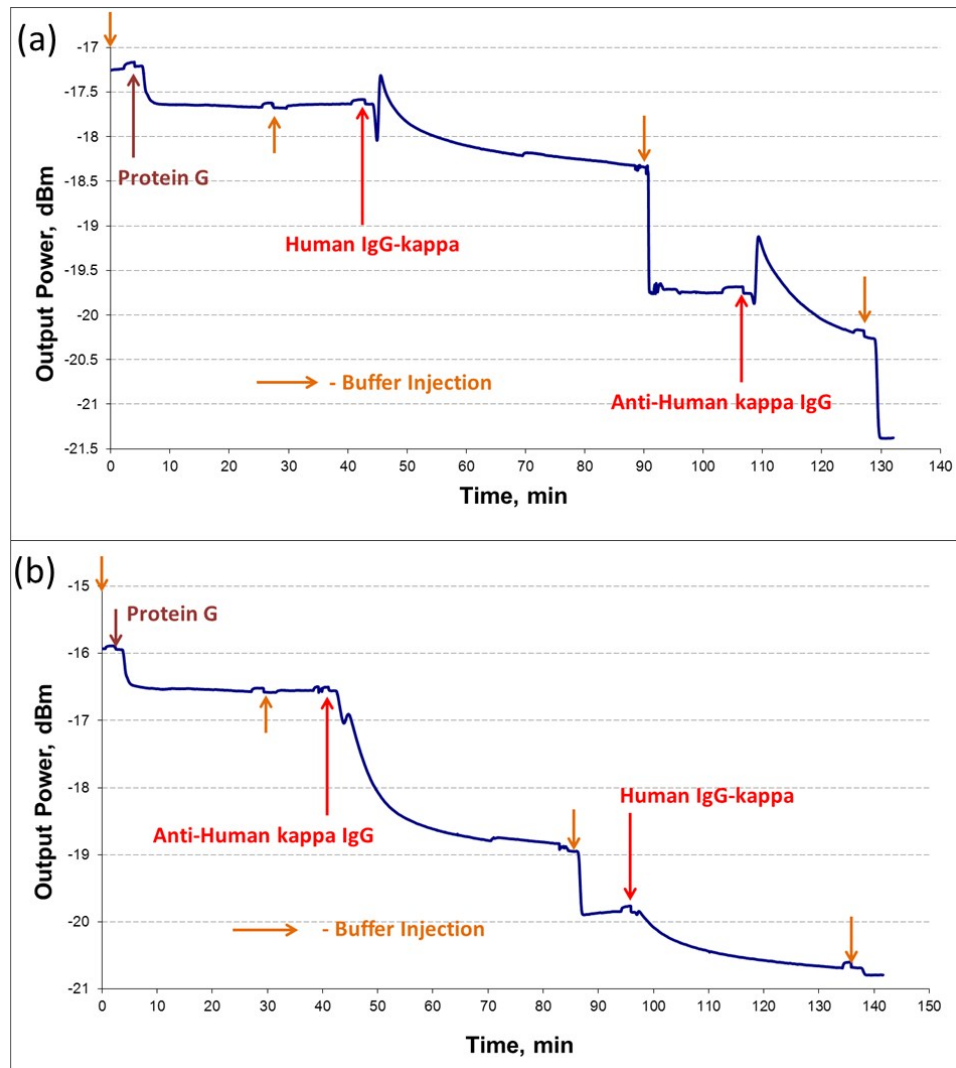

**Fig. S2** Full experimental procedures for validation with standard human IgG $\kappa$  and AK using both approaches: (a) Reverse approach; (b) Direct approach.

**Table S3A** Experimental results and computational analysis to obtain binding strength for validation of human IgGκ/λ and goat anti-human κ/λ interactions for Fig. 4 in the main text. Reverse approach.

| Surface Testing          | Test                                 | Replicate | Step    | $\left[ \frac{P_{ao}}{P_{a1}} - 1 \right] \times 100$ | $\left[ \frac{\Delta\Gamma(analyte)}{\Delta\Gamma(surface)} \right] \times 100$ |              |
|--------------------------|--------------------------------------|-----------|---------|-------------------------------------------------------|---------------------------------------------------------------------------------|--------------|
| <b>KAPPA</b>             | <b>Kappa Binding Strength</b>        | 1         | PG+IgGκ | <b>62.55</b>                                          | <b>72.27</b>                                                                    |              |
|                          |                                      |           | IgGκ+AK | <b>45.21</b>                                          |                                                                                 |              |
|                          |                                      | 2         | PG+IgGκ | <b>86.64</b>                                          |                                                                                 | <b>58.47</b> |
|                          |                                      |           | IgGκ+AK | <b>50.66</b>                                          |                                                                                 |              |
|                          |                                      | 3         | PG+IgGκ | <b>46.89</b>                                          |                                                                                 | <b>62.10</b> |
|                          |                                      |           | IgGκ+AK | <b>29.12</b>                                          |                                                                                 |              |
|                          | Average Binding Strength             |           |         |                                                       |                                                                                 | <b>64.28</b> |
|                          | Standard Deviation                   |           |         |                                                       |                                                                                 | <b>7.15</b>  |
|                          | <b>Kappa-Lambda Cross-reactivity</b> | 1         | PG+IgGκ | <b>68.27</b>                                          | <b>14.81</b>                                                                    |              |
|                          |                                      |           | IgGκ+AL | <b>2.33</b>                                           |                                                                                 |              |
|                          |                                      | 2         | PG+IgGκ | <b>73.78</b>                                          | <b>48.16</b>                                                                    |              |
|                          |                                      |           | IgGκ+AL | <b>3.04</b>                                           |                                                                                 |              |
|                          |                                      | 3         | PG+IgGκ | <b>36.14</b>                                          | <b>13.66</b>                                                                    |              |
|                          |                                      |           | IgGκ+AL | <b>1.86</b>                                           |                                                                                 |              |
| Average Binding Strength |                                      |           |         |                                                       | <b>4.22</b>                                                                     |              |
| Standard Deviation       |                                      |           |         |                                                       | <b>0.87</b>                                                                     |              |
| <b>LAMBDA</b>            | <b>Lambda Binding Strength</b>       | 1         | PG+IgGλ | <b>77.83</b>                                          | <b>48.06</b>                                                                    |              |
|                          |                                      |           | IgGλ+AL | <b>37.40</b>                                          |                                                                                 |              |
|                          |                                      | 2         | PG+IgGλ | <b>52.05</b>                                          |                                                                                 | <b>52.54</b> |
|                          |                                      |           | IgGλ+AL | <b>27.35</b>                                          |                                                                                 |              |
|                          |                                      | 3         | PG+IgGλ | <b>43.55</b>                                          |                                                                                 | <b>60.79</b> |
|                          |                                      |           | IgGλ+AL | <b>26.47</b>                                          |                                                                                 |              |
|                          | Average Binding Strength             |           |         |                                                       |                                                                                 | <b>53.80</b> |
|                          | Standard Deviation                   |           |         |                                                       |                                                                                 | <b>6.46</b>  |
|                          | <b>Lambda-Kappa Cross-reactivity</b> | 1         | PG+IgGλ | <b>75.79</b>                                          | <b>5.84</b>                                                                     |              |
|                          |                                      |           | IgGλ+AK | <b>4.42</b>                                           |                                                                                 |              |
|                          |                                      | 2         | PG+IgGλ | <b>34.28</b>                                          | <b>5.12</b>                                                                     |              |
|                          |                                      |           | IgGλ+AK | <b>1.76</b>                                           |                                                                                 |              |
|                          |                                      | 3         | PG+IgGλ | <b>53.11</b>                                          | <b>6.95</b>                                                                     |              |
|                          |                                      |           | IgGλ+AK | <b>3.69</b>                                           |                                                                                 |              |
| Average Binding Strength |                                      |           |         |                                                       | <b>5.96</b>                                                                     |              |
| Standard Deviation       |                                      |           |         |                                                       | <b>0.75</b>                                                                     |              |

**Table S3B** Experimental results and computational analysis to obtain binding strength for validation of human IgGκ/λ and goat anti-human κ/λ interactions for Fig. 4 in the main text. Direct approach.

| Test                          | Step             | Response<br>$\left[ \frac{P_{ao}}{P_{a1}} - 1 \right] \times 100$ | Binding Strength, g/g<br>$\left[ \frac{\Delta\Gamma(analyte)}{\Delta\Gamma(surface)} \right] \times 100$ |
|-------------------------------|------------------|-------------------------------------------------------------------|----------------------------------------------------------------------------------------------------------|
| Kappa Binding Strength        | PG+AK            | <b>113.80</b>                                                     | <b>21.24</b>                                                                                             |
|                               | AK+IgG $\kappa$  | <b>24.17</b>                                                      |                                                                                                          |
| Kappa-lambda Cross-reactivity | PG+AK            | <b>106.54</b>                                                     | <b>3.30</b>                                                                                              |
|                               | AK+IgG $\lambda$ | <b>3.51</b>                                                       |                                                                                                          |
| Lambda Binding Strength       | PG+AL            | <b>162.42</b>                                                     | <b>16.12</b>                                                                                             |
|                               | AL+IgG $\lambda$ | <b>26.18</b>                                                      |                                                                                                          |
| Lambda-Kappa Cross-reactivity | PG+AL            | <b>137.68</b>                                                     | <b>4.84</b>                                                                                              |
|                               | AL+IgG $\kappa$  | <b>6.66</b>                                                       |                                                                                                          |

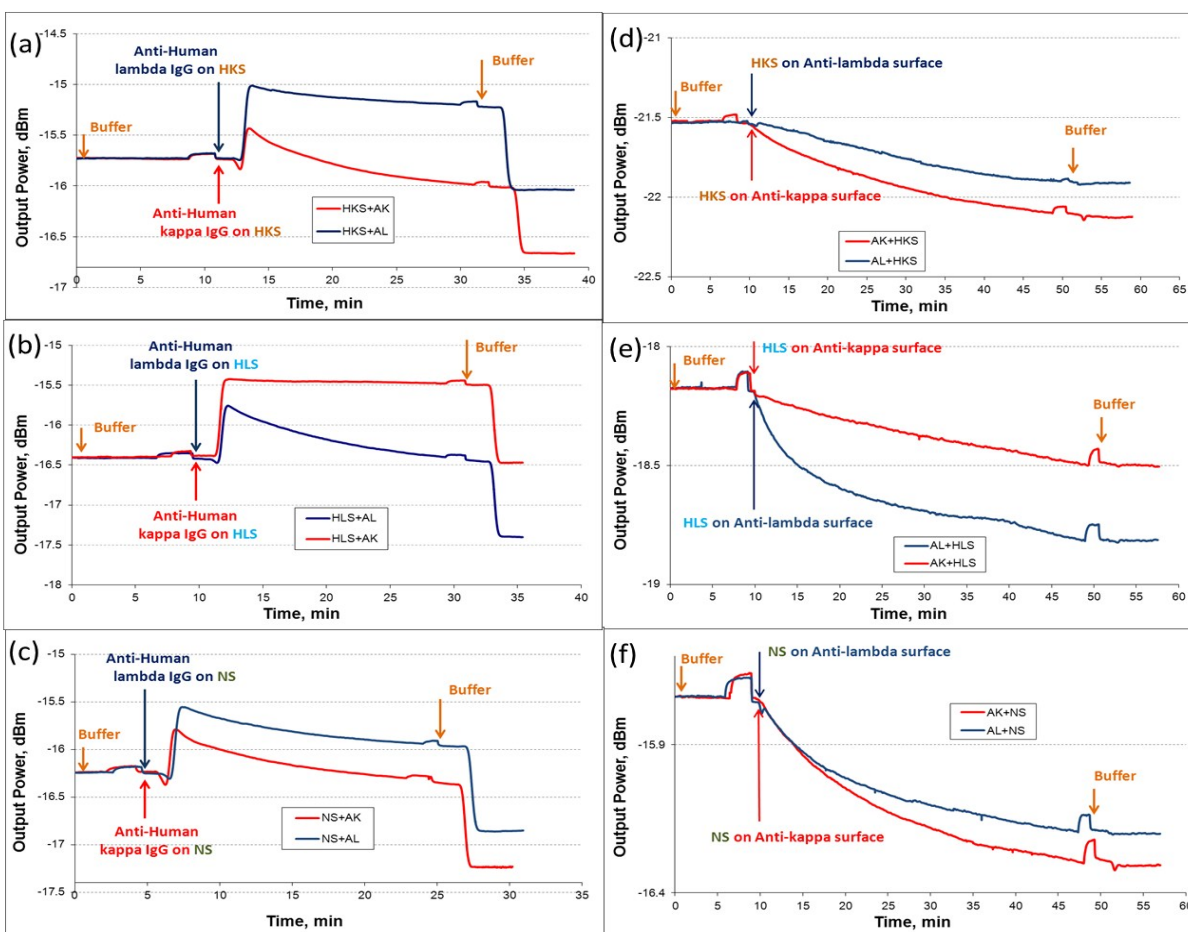

**Fig. S4.** Real-time responses for HKS, HLS and NS. Reverse approach: (a) Response of HKS-functionalized surface for AK and AL. (b) Response of HLS-functionalized surface for AK and AL. (c) Response of NS-functionalized surface for AK and AL. Direct approach: (d) Response of AK- and AL-functionalized surface for HKS, (e) Response of AK- and AL-functionalized surface for HLS, (f) Response of AK- and AL-functionalized surface for NS.

**Table S5.** Experimental results and computational analysis to obtain  $\kappa$ - $\lambda$  ratio for HKS, HLS and NS; direct approach.

| Patient Sample    | Step   | $\frac{P_{ao}}{P_{a1}} - 1 \times 100$ | $\frac{Binding\ Strength,\ g/g}{[\Delta\Gamma(recognition\ IgG)]} \times 100$ | IgG light chain Ratio         |
|-------------------|--------|----------------------------------------|-------------------------------------------------------------------------------|-------------------------------|
| High Kappa Serum  | PG+AK  | <b>53.11</b>                           | <b>26.41</b>                                                                  | 2.61 ( $\kappa$ : $\lambda$ ) |
|                   | AK+HKS | <b>14.02</b>                           |                                                                               |                               |
|                   | PG+AL  | <b>53.82</b>                           | <b>10.11</b>                                                                  |                               |
|                   | AL+HKS | <b>5.44</b>                            |                                                                               |                               |
| High Lambda Serum | PG+AL  | <b>84.93</b>                           | <b>19.01</b>                                                                  | 2.55 ( $\lambda$ : $\kappa$ ) |
|                   | AL+HLS | <b>16.14</b>                           |                                                                               |                               |
|                   | PG+AK  | <b>102.77</b>                          | <b>7.44</b>                                                                   |                               |
|                   | AK+HLS | <b>7.65</b>                            |                                                                               |                               |
| Normal Serum      | PG+AK  | <b>52.76</b>                           | <b>27.08</b>                                                                  | 1.72 ( $\kappa$ : $\lambda$ ) |
|                   | AK+NS  | <b>14.29</b>                           |                                                                               |                               |
|                   | PG+AL  | <b>71.00</b>                           | <b>15.74</b>                                                                  |                               |
|                   | AL+NS  | <b>11.17</b>                           |                                                                               |                               |
